# Supplementary material
Source: Research Square preprint supplement (doi:10.21203/rs.3.rs-9607748/v1)
Supplement: Supplementary file 1 [file c519121dcac37e54a204f614.docx]

**Supplementary material**

Table S1. Description of flood regime for maintenance and regeneration of dominant plant species in nine wetland vegetation classes in the Murray–Darling Basin, based on Roberts and Marston, 2011; Casanova 2015 and Chen *et al*. 2025

| Wetland vegetation class | Dominant species | Flood requirement for maintenance | Flood requirement for regeneration (seedling establishment) | Location | Interval for critical condition |
| --- | --- | --- | --- | --- | --- |
| Semi-arid Floodplain Grasslands | River cooba *Acacia stenophylla* & Queensland bluebush *Chenopodium auricomum* | Frequency: every 3-7 yrs.; depth: not critical; duration: 2-3 mo. | Unknown; possibly tolerant to temporary waterlogging for seedling establishment | Upper floodplain | Up to 5 yrs., if near waterbodies, possibly 10-15 yrs. |
| Inland Floodplain Shrublands | Lignum *Duma florulenta* shrublands with ephemeral cover of sedges | Frequency: every 1-3 yrs.; depth: not critical; duration: 3-7 mo. | Flood every 12 to 18 months in first 3 yrs.; shallow, 5-15 cm; short duration about 4-6 wks. Season critical: late spring or summer | Lower floodplain | <1 in 11 yrs., duration of 3 months |
| Inland Floodplain Swamps | Common reed *Phragmites australis*, water couch *Paspalum distichum* & cumbungi *Typha* spp. | Frequency: mostly annual or near-annual floods;  depth: shallow to deep; duration: 5-8 mo. for water couch; 8-12 mo. for common reed | Shallow, 10-50 cm, no more than 4 weeks. | Lower floodplain | Re-flooding after 2-3 yrs. |
| Eastern Riverine Forests | River oak *Casuarina cunninghamiana* | Not applicable; benefit from fresh & overbank flows | Needs waterlogging 3-5 days; season: spring, summer | Riparian zone |  |
| Inland Riverine Forests | River red gum *Eucalyptus camaldulensis* | Frequency: every 1-3 yrs.; depth: not critical; duration 5-7 mo. | Follow-up flood in yr. of germination to maintain soil moisture; shallow water (20–30 cm) for 4–6 wks. & spring flood recession for germination | Riparian zone & lower floodplain | 1 in 10 yrs., duration of 2–8 months |
| Inland Saline Lakes | Succulent halophytic herbs, e.g. *Tecticornia* spp. | Frequency: 1/3-7 yrs. or annual or 1/1-3 yrs.; depth: not critical; duration: several mo. | No data available | Floodplain |  |
| Estuarine Wetlands | Fringing emergent and submerged aquatic plants e.g. *Ruppia* spp. | Annual freshwater inflows required to maintain salinity regime & depth of estuarine lagoon |  | Estuarine |  |
| Inland Floodplain Woodlands | Black box *Eucalyptus largiflorens* with saltbush understorey | Frequency: every 3-7 yrs.; depth: not critical;  duration: 3-6 mo. | Seedlings intolerant to drought; growth is slow if flood over 5 cm. Recession in spring-summer | Mid-upper floodplain | <1 in 15 yrs. |
| North-west Floodplain Woodlands | Coolibah *Eucalyptus coolabah* with grassy understorey | Frequency: every 10-20 yrs.; depth: not critical;  duration: 9 to 12 mo. | Flood recession in spring-summer | Mid-upper floodplain | >20 yrs., less without groundwater |

Table S2. Extent (km²) of each wetland vegetation class that is optimally flooded, sub-optimally flooded or dry within each Basin state and the percentage contribution to total wetland vegetation in each state

|  | New South Wales | | | Victoria | | | South Australia | | | Queensland | | |
| --- | --- | --- | --- | --- | --- | --- | --- | --- | --- | --- | --- | --- |
| Vegetation Class | Optimal | Sub-optimal | Dry | Optimal | Sub-optimal | Dry | Optimal | Sub-optimal | Dry | Optimal | Sub-optimal | Dry |
| Semi-arid Floodplain Grasslands | 0 | 6,733 | 3,198 |  |  |  |  |  |  | 0 | 1,381 | 2,920 |
| Inland Floodplain Shrublands | 767 | 9,458 | 4,416 | 40 | 633 | 175 | 2 | 124 | 3 | 86 | 290 | 190 |
| Inland Floodplain Swamps | 180 | 1,404 | 152 | 60 | 131 | 29 | 13 | 62 | 2 | 179 | 355 | 158 |
| Eastern Riverine Forests | 0 | 49 | 502 |  |  |  |  |  |  | 0 | 5 | 41 |
| Inland Riverine Forests | 746 | 5,513 | 904 | 183 | 940 | 569 | 19 | 169 | 170 | 90 | 1,834 | 1,670 |
| Inland Saline Lakes | 174 | 2,372 | 4,958 | 213 | 218 | 284 | 9 | 161 | 68 | 70 | 109 | 29 |
| Inland Floodplain Woodlands | 0 | 4,886 | 4,081 | 1 | 1,182 | 2,120 |  | 133 | 31 |  | 131 | 113 |
| North-west Floodplain Woodlands | 53 | 16,326 | 11,624 |  |  |  |  |  |  | 9 | 5,287 | 3,723 |
| Estuarine Wetlands |  |  |  |  |  |  |  | 1,388 | 37 |  |  |  |
| Total | 1,922 | 46,741 | 29,836 | 496 | 3,104 | 3,177 | 43 | 2,036 | 312 | 435 | 9,393 | 8,842 |
| % of total state wetland vegetation | 2.4 | 59.5 | 38.0 | 7.3 | 45.8 | 46.9 | 1.8 | 85.2 | 13.1 | 2.3 | 50.3 | 47.4 |

Table S3. Extent (km²) of each wetland vegetation class that is optimally flooded, sub-optimally flooded, or dry within the actively managed floodplain in each Basin state, and the percentage contribution to the total wetland vegetation area within each state

|  | New South Wales | | | Victoria | | | South Australia | | | Queensland | | |
| --- | --- | --- | --- | --- | --- | --- | --- | --- | --- | --- | --- | --- |
| Vegetation Class | Optimal | Sub-optimal | Dry | Optimal | Sub-optimal | Dry | Optimal | Sub-optimal | Dry | Optimal | Sub-optimal | Dry |
| Semi-arid Floodplain Grasslands | 0 | 175 | 17 |  |  |  |  |  |  |  |  | 0 |
| Inland Floodplain Shrublands | 48 | 1,505 | 458 | 1 | 64 | 9 | 1 | 64 | 0 |  |  |  |
| Inland Floodplain Swamps | 82 | 374 | 4 | 12 | 35 | 3 | 6 | 13 | 0 | 0 |  | 0 |
| Eastern Riverine Forests |  | 20 | 39 |  |  |  |  |  |  |  | 2 | 8 |
| Inland Riverine Forests | 580 | 2,777 | 175 | 118 | 331 | 113 | 18 | 99 | 10 | 35 | 138 | 13 |
| Inland Saline Lakes | 116 | 145 | 110 | 5 | 13 | 1 | 3 | 46 | 1 |  |  |  |
| Inland Floodplain Woodlands | 0 | 1,231 | 547 | 1 | 169 | 95 |  | 36 | 3 |  |  | 0 |
| North-west Floodplain Woodlands | 1 | 1,105 | 255 |  |  |  |  |  | 0 | 0 | 95 | 6 |
| Estuarine Wetlands |  |  |  |  |  |  |  | 1,388 | 37 |  |  |  |
| Total | 827 | 7,332 | 1,607 | 137 | 613 | 221 | 29 | 1,646 | 51 | 35 | 235 | 27 |
| % of total state wetland vegetation | 1.1 | 9.3 | 2.0 | 2.0 | 9.0 | 3.3 | 1.2 | 68.8 | 2.2 | 0.2 | 1.3 | 0.1 |

Table S4. Season of each environmental watering event from 2014–15 to 2023–24. Late winter and early spring cover August to September. Detailed information on the duration and volume of each environmental watering event is in the Excel sheets that can be download from ANU Data Commons.

| Year | Late winter to early spring | Mid-spring to summer | Autumn to winter | Over three seasons | Unresolved | Total |
| --- | --- | --- | --- | --- | --- | --- |
| 2023-24 | 3 | 20 | 13 | 4 | 1 | 41 |
| 2022-23 | 8 | 19 | 15 | 4 | 1 | 47 |
| 2021-22 | 5 | 56 | 29 | 15 | 2 | 107 |
| 2020-21 | 2 | 51 | 17 | 8 | 1 | 79 |
| 2019-20 | 2 | 46 | 13 | 7 | 1 | 69 |
| 2018-19 | 6 | 38 | 16 | 3 | 2 | 65 |
| 2017-18 | 5 | 58 | 26 | 7 | 1 | 97 |
| 2016-17 | 10 | 36 | 30 | 4 | 1 | 81 |
| 2015-16 | 8 | 76 | 25 | 13 |  | 122 |
| 2014-15 | 3 | 50 | 22 | 7 |  | 82 |
| Total | 52 | 450 | 206 | 72 | 10 | 790 |
| % in total events | 7 | 57 | 26 | 9 | 1 | 100 |

Table S5. Extent (km2) and number of annual inundation events influenced by Commonwealth environmental water (CEW) over 10 years (2014-15 to 2023-24) on nine wetland vegetation classes or outside wetland vegetation. CEW frequency represents number of years that has been watered in ten years.

| CEW frequency (years) | Total inundation extent | Inland Floodplain Shrublands | Inland Floodplain Swamps | Inland Floodplain Woodlands | Inland Riverine Forests | Inland Saline Lakes | North-west Floodplain Woodlands | Semi-arid Floodplain Grasslands | Eastern Riverine Forests | Estuarine wetlands | Outside wetland vegetation |
| --- | --- | --- | --- | --- | --- | --- | --- | --- | --- | --- | --- |
| 1 | 1,913 | 276 | 61 | 235 | 582 | 139 | 115 | 73 | 1 | 3 | 428 |
| 2 | 572 | 94 | 33 | 109 | 186 | 14 | 30 | 13 | 0 | 1 | 92 |
| 3 | 361 | 41 | 23 | 65 | 115 | 15 | 21 | 12 | 0 | 0 | 69 |
| 4 | 250 | 23 | 24 | 36 | 82 | 2 | 9 | 19 | 0 | 0 | 55 |
| 5 | 220 | 30 | 37 | 21 | 65 | 3 | 4 | 17 | 0 | 0 | 43 |
| 6 | 141 | 11 | 32 | 23 | 47 | 6 | 1 | 3 | 0 | 0 | 18 |
| 7 | 98 | 8 | 21 | 12 | 38 | 0 | 1 | 1 | 0 | 0 | 17 |
| 8 | 67 | 9 | 21 | 7 | 18 | 0 | 0 | 1 | 0 | 1 | 10 |
| 9 | 54 | 2 | 30 | 3 | 13 | 0 | 0 | 0 | 0 | 3 | 2 |
| 10 | 1,060 | 0.2 | 5 | 0 | 0 | 0 | 0 | 0 | 0 | 1,019 | 35 |
| Total | 4,736 | 494 | 287 | 511 | 1,146 | 179 | 181 | 139 | 1 | 1,028 | 769 |
| % total area watered |  | 10 | 6 | 11 | 24 | 4 | 4 | 3 | 0 | 22 | 16 |
